# Supplementary material
Source: HighWire-hosted journal article supplement (https://www.annals.org/content/suppl/2008/05/27/148.11.801)
Supplement: Levy_Appendix_148-11-801-DC1-A1.pdf [file Levy_Appendix_148-11-801-DC1-A1.pdf]

**APPENDIX**  **Web-Only**

The information presented in this appendix addresses 8 statistical and sampling issues related to our findings. The first is how well the expanded Simplified Acute Physiology Score II (SAPS II) accurately predicts hospital mortality compared with the current SAPS II. The second is the sensitivity of the results to changes in the propensity score. The third determines how results compare when using either random-effects logistic regression (which takes into account the fact that the 101 832 participants are nested within 123 intensive care units [ICUs]) or regular logistic regression (which does not take into account the hierarchical nature of the data). The fourth is a subanalysis of only those patients who received treatment in ICUs that offered a choice in critical care management (CCM). The fifth is a comparison of explicit decomposition of the within and between hospital effects of CCM. The sixth is a conditional logistic regression using matching based on an expanded propensity score. The seventh repeats the analysis presented in the manuscript using the expanded propensity score. The eighth addresses a question about the extent to which hospitals in the Project IMPACT (Cerner, Bel Air, Maryland) database compare with other hospitals in the United States.

**Expanded SAPS II**

Management practices in hospitals and ICUs today have improved patient outcomes and SAPS II probability of mortality (which was developed >15 years ago) but does not adequately reflect current hospital mortality (1). A newly developed expanded SAPS II uses the original SAPS II score along with the patient's age, sex, length of in-hospital stay before ICU admission, patient's location before the ICU, clinical category, and intoxication to improve the probability of hospital mortality (2). Table 1 was recreated from Table 4 in the manuscript and gives standardized mortality ratios and their 95% CI (based on the exact Poisson methods) over the ICU level variable, indicating the percentage of patients who receive CCM ( $\leq 5\%$ ,  $5\%–95\%$ ,  $\geq 95\%$ ), and over patient-level care CCM (yes or no). The SAPS II overestimates mortality (as can be seen in all 6 standardized mortality ratios that range from 0.63 to 0.78). Table 1 shows that when the expanded SAPS II is used to create the 6 SMR, the values range from 0.91 to 1.19. Thus, the expanded SAPS II was used in all of the analyses run in our study. Note that the standardized mortality ratios for the group who received CCM for the entire stay are consistently higher than the group who did not, independent of which SAPS II score is used.

**Propensity Score Sensitivity Analysis**

The accuracy of our results depends on how well the propensity score discriminates between those who received CCM and those who did not. Four analyses were done to determine the sensitivity of our results to changes in our propensity score. The first looked at how well the variables in the propensity score were balanced across the quartiles of propensity score. Balance implies that either the means or proportions were

comparable across the risk factor of CCM within a propensity score quartile. Table 2 shows that some of the variables are not balanced, whereas some are. Most are statistically different due, in part, to the large sample size. The variables that were not balanced were added back in the model as covariates to control for the additional imbalance that is not accounted for in the propensity score. Only covariates that were significantly associated ( $P < 0.05$ ) with hospital mortality were kept in the model. Tables 3 and 4 were created from Tables 5 and 6 by using the new model with the additional covariates. Compared with the original tables, there is very little difference between the results, as indicated by similar mortality odds ratios and their associated  $P$  values. The second analysis includes the addition of statistically nonsignificant variables to the propensity score that were suggested might be clinically important. We added 3 additional variables to the propensity score: affiliation of the hospital with a medical school (yes or no), ICU type (combined medical or surgical or other; medical only; or surgical or trauma only), and nursing policy (registered professional nurse/ /licensed practical nurse, registered professional nurse only, or registered professional nurse with Critical Care Nurse). We then recreated Table 5 from the manuscript, which is shown below as Table 5. Very little difference is seen in the 16 odds ratios compared with the manuscript Table 5. Thus, addition of these statistically nonsignificant variables does not change the overall results of the study.

The third analysis tested how sensitive the mortality odds ratios were to removing the 4 most influential variables, 1 variable at a time, from the propensity score and then running the logistic regression model. The 4 most influential variables are based on the size of their logistic regression model coefficients in the original propensity score. These are noninvasive ventilation at ICU admission, ventilator in place at ICU admission, tracheostomy in place at ICU admission, and hospital classification (rural, suburban, and urban). In order to compare the effect of removing these variables from the propensity score on the CCM odds ratio, a weighted average of the 16 combinations of SAPS II quartiles and propensity quartiles were calculated for the original propensity score and for each of the propensity scores with the influential variable removed 1 at a time shown in Table 6. When the noninvasive ventilation variable was removed from the propensity score, the weighted average CCM odds ratio was 1.45, which is the same as the original propensity score. When the ventilator in place and tracheostomy in place variables were removed, both of these odds ratios increased to 1.46. When the hospital classification variable was removed the average odds ratio decreased to 1.40. The stability of these 4 mortality odds ratios indicates the robustness of our current propensity score to changes in its makeup.

The fourth sensitivity analysis was designed to estimate the effect of a missing or unknown binary covariate on the propensity score (3, 4). If the true mortality odds ratio for CCM versus no CCM was in fact 1.33, then this missing covariate in the propensity score would have to have a 3.5-fold increase in the odds of mortality and a 3.5-fold increase in the odds of being assigned to the CCM in order to misrepresent the odds ratio as 1.64 (the weighted average of the 16 odds ratios from manuscript Table 5). It was also assumed that half of the patients had this missing covariate. In addition, if the missing covariate had a 6-fold increase in the odds of mortality and a 6-fold increase in the odds

of being assigned to CCM, then a true odds ratio of 0.99 (CCM protective) would be misrepresented as 1.64. We feel that it is highly unlikely that there exists an unknown dichotomous variable in the PI database that we did not include in the propensity score that would have this large of an affect.

### **Random-Effects Logistic Regression**

In the manuscript we ran a random-effects logistic regression, which takes into account that all of 101 832 subjects are nested within the 123 ICUs. Thus, the model uses the between ICU variability and within ICU variability to generate point estimates and standard errors. The model also generates a statistic called “ $\rho$ ” that is equal to the ratio of the between ICU variance to the total variance and ranges from 0 to 1. Zero indicates that all the variability is within the ICU, and 1 indicates that all the variability is between ICUs. Our current model gives an overall  $\rho$  of 0.03 for the logistic regression model with CCM, propensity score, SAPS II probability of mortality and their interaction terms. This means that there is not an ICU effect that is confounding the results. Most of the variability is within the ICU and very little exists between ICUs. We also ran regular logistic regression to compare the results with the random-effects logistic regression and recreated Tables 5 and 6 from the manuscript using logistic regression with the results shown below as Tables 7 and 8. The odds ratios in Tables 7 and 8 are similar to values in manuscript Tables 5 and 6, indicating that ICU is not confounding the results. This agrees with the small  $\rho$  values generated in the random-effects logistic regression.

### **Analysis of Patients in ICUs that offer a Choice of CCM**

Table 9 shows the 16 mortality odds ratio for ICUs in which there was a choice of CCM or no CCM, defined by quartiles of propensity and quartiles of expanded SAPS II. The choice group is defined by those hospitals that manage between 5% and 95% of their patients with CCM and represents 59.3% of the patients in the database (60 344). Quartile number 1 are those patients with the lowest propensity scores (or lowest SAPS II), whereas quartile 4 has the highest propensity scores (or highest SAPS II). These results indicate that 15 of 16 mortality odds ratios are greater than 1, and of these 15, 8 are statistically significant at the 0.05 level and 1 is very close with a  $P$  value = 0.057. When compared with Table 5 in the manuscript, the results are very similar. The  $P$  values tend to be a little larger, but this is caused by the smaller sample sizes in the 16 combinations of quartiles of probability and propensity scores.

### **Comparison of Explicit Decomposition of the Within and Between Hospital Effects**

Table 10 shows the mortality odds ratio for CCM versus no CCM for various logistic regression techniques. All of the models contain the risk factor (CCM vs. no CCM) and are adjusted for the current propensity score and expanded SAPS II. There was no CCM interaction terms included in these models because for comparison purposes we only looked at the main effect. The random-effects model controls for potential confounding by the 123 hospital/ICUs. The between hospital error variance was 0.13, whereas the within hospital error variance was 3.29.  $\rho$ , which is the ratio of between hospital

variance to total variance, is equal to 0.04, indicating that the mortality odds ratio will be very similar to the logistic regression odds ratio for CCM versus no CCM. The between-effects regression generates an odds ratio based on the average response of the explanatory variables over the 123 hospital/ICUs. The mortality odds ratio is very similar to the logistic regression odds ratio because only about 4% of the variability is between the hospitals. The fixed-effects regression obtains the within hospital/ICU effects by using a conditional logistic regression. Again these results are similar to random-effects logistic regression because most of the variability is within the hospital/ICUs.

### **Conditional Logistic Regression using Matching, based on an Expanded Propensity Score**

An expanded propensity score was developed using only hospitals where there was choice of CCM or no CCM. In this situation *choice* was determined by looking at each of the 123 hospital/ICUs and keeping only those that directed patients to either CCM or no CCM. In order to develop stable models for the individual propensity scores, we only used hospitals that had enough patients to adequately model the number of variables in our propensity score. We started with 101 832 patients and dropped 34 399 due to a lack of choice. This left 67 433 patients in 70 hospitals. Next, we kept only those hospitals that had at least 350 patients assigned to CCM and at least 350 patients assigned to no CCM. This left 33 578 patients in 19 hospitals that we could use to develop a propensity score for each individual hospital. Finally, no 2-way interaction terms were used in the propensity score because there would be greater than 740 additional variables entered into the model that would lead to instability in the standard errors of the estimated coefficients

Table 11 presents all of the variables we considered for the propensity score. Variables 1 to 25 are all patient-level variables, whereas variables 26 to 34 are all hospital-level variables. We calculated the propensity score for each of the 19 hospitals individually using only patient-level variables. We used both patient-level and hospital-level variables when the propensity score was developed for the entire cohort of 101 832 patients.

Because many of the patient-level variables were categorical with more than 2 categories, the propensity score model contained 39 covariates, including the dummy variables. These same 39 covariates were kept in each of the 19 propensity score models regardless of their individual *P* values. Hospital-level variables do not change when creating propensity scores within a specific hospital and were not entered into the model.

Patients were matched on propensity scores by ranking the propensity score within each hospital. Cases were the patients that died within strata, and controls were those that lived. Strata were defined using the first case in the ranked propensity score and ending at the last live patient before the next case. More than 1 case could be included in the strata if the first case was immediately followed by 1 or more cases that did not have any controls in between. Unless the very first patient (the person with the lowest propensity

score) died, all of the patients in this first stratum were dropped because it does not contain a case. Any patient that did not have a propensity score was also dropped from the strata. Missing propensity scores were due to missing observations in the variables used to develop the propensity score. These strata were considered the full data set for these analyses.

Many of the strata were large because there were not many cases (deaths). Because this data set was not designed for a matched case–control analysis, the propensity score could vary over the strata. Thus, all strata were limited to a set number of observations, which was determined from the median of the number of observations in each stratum. The observations associated with propensity scores far from the case were dropped if the number of observations in a particular stratum were above the median observations of all the strata. These strata were considered the reduced data set for these analyses.

Conditional logistic regression analysis was run separately on each of the 19 hospitals. For comparison purposes, we individually ran logistic regression on these same 19 hospitals using our original propensity score and again with our expanded propensity score. These regression models contained the same 3 main effects of CCM, expanded SAPS II, and propensity score. Table 12 compares the odds ratios using logistic regression and the original propensity score, logistic regression and the expanded propensity score, conditional logistic regression on the reduced data set, and conditional logistic regression on the full data set. When the original propensity score was used in a logistic regression model, 15 of 19 have an odds ratio greater than 1.0, and of these, 9 are statistically significant. When the expanded propensity score was used in a logistic regression model, 16 of 19 have an odds ratio greater than 1.0, and of these, 8 are statistically significant. When conditional logistic regression was run that matched on propensity score and when controls that did not have a comparable propensity score were removed (reduced data set), 18 of 19 had an odds ratio greater than 1.0 and of these 9 are statistically significant. When conditional logistic regression was run that matched on propensity score (full data set), 18 of 19 had an odds ratio greater than 1.0, and of these, 9 were statistically significant.

Expanded strata containing cases and controls were developed when the all of the propensity scores from the 19 hospitals were combined using the reduced data set. The conditional logistic regression mortality odds ratio for CCM versus no CCM was 2.16 ( $P < 0.001$ ); however, there was a statistically significant interaction between CCM and SAPS II ( $P = 0.006$ ). Consequently, the same analysis was run over the 4 quartiles of SAPS II by using expanded strata developed of each quartile. Table 13 shows the results. All 4 odds ratios are greater than 1.0; however, only the quartiles 3 and 4 are statistically significant. For comparison purposes, Table 14 shows the same 19 hospitals by using random-effects logistic regression and the original propensity score over the 4 quartiles of SAPS II. The results are almost identical to those in Table 13. When the same conditional logistic regression is run using the full data set, the results (shown in Table 15) are again similar to the reduced data set analysis and the random-effects logistic regression analysis using the original propensity score.

### Analysis of the Entire Data Set using the Expanded Propensity Score

We ran the entire data set (101 832 patients) using random-effects logistic regression with a propensity score developed using the expanded list of patient-level variables and hospital-level variables (Table 11) in order to compare this analysis to the manuscript results (Table 5 in the manuscript). Table 16 shows the same random-effects logistic regression mortality odds ratios for CCM versus no CCM, stratified by quartiles of propensity score. There was a statistically significant interaction between CCM and the propensity score, whereas there was not a statistically significant interaction between CCM and expanded SAPS II, unlike the manuscript results. Consequently, the analyses are run over quartiles of propensity score adjusted for expanded SAPS II. The propensity score includes both patient-level variables and hospital-level variables. The odds ratio is the highest for those patients with the lowest propensity to receive CCM. The odds ratio then decreases as propensity quartile increases. The odds ratio for the highest quartile of propensity score is not statistically different from 1.0. These results are similar to the results in the manuscript, with the exception that now there is not a statistically significant interaction between CCM and SAPS II. Thus, only 4 odds ratios compared with 16 in the manuscript exist.

### Project IMPACT Hospital Sample

The hospitals in the PI database include academic (university affiliated) as well as for profit and not for profit, community hospitals. We therefore compare our hospital sample with these types of hospitals in the American Hospital Association (AHA) (Table 17). Hospitals in the Project IMPACT database are disproportionately larger and represent more community nonprofit hospitals but have a similar geographic distribution to AHA hospitals.

### References

1. **Le Gall JR, Lemeshow S, Saulnier F.** A new Simplified Acute Physiology Score (SAPS II) based on a European/North American multicenter study. *JAMA*. 1993;270:2957-63. [PMID: 8254858]
2. **Le Gall JR, Neumann A, Hemery F, Bleriot JP, Fulgencio JP, Garrigues B, et al.** Mortality prediction using SAPS II: an update for French intensive care units. *Crit Care*. 2005;9:R645-52. [PMID: 16280063]
3. **Rosenbaum PR, Rubin DB.** Assessing sensitivity to an unobserved binary covariate in an observational study with binary outcome. *J R Stat Soc [Ser B]* 1983;45:212-218.
4. **Rosenbaum PR, Rubin DB.** The central role of the propensity score in observational studies for causal effects. *Biometrika*. 1983;70:41-55.

**Table 1. Expected and Actual Hospital Mortality, by ICU and CCM\***

| Patient Variable†        | Intensive Care Unit Type |                  |                  |                  |                  |                  |
|--------------------------|--------------------------|------------------|------------------|------------------|------------------|------------------|
|                          | CCM‡                     |                  |                  | No CCM‡          |                  |                  |
|                          | ≥95%                     | 5%–95%           | ≤5%              | ≥95%             | 5%–95%           | ≤5%              |
| Patients, n§             | 18 601                   | 23 324           | 261              | 17               | 37 020           | 22 609           |
| Mean SAPS II probability | 0.2378                   | 0.2473           | 0.2301           | 0.0827           | 0.1599           | 0.1951           |
| Mean mortality Rate      | 0.1800                   | 0.1884           | 0.1801           | 0.0588           | 0.1004           | 0.1244           |
| SMR (95% CI)             | 0.76 (0.73–0.78)         | 0.76 (0.74–0.78) | 0.78 (0.57–1.04) | 0.71 (0.02–3.96) | 0.63 (0.61–0.65) | 0.64 (0.61–0.66) |

\* This table is recreated from Table 4 in the manuscript using the original SAPS II. CCM = critical care management; ICU = intensive care unit; SAPS II = Simplified Acute Physiology Score; SMR = standardized mortality ratio.

† CCM is a patient-level variable that indicates whether or not the patient was managed by a critical care physician for the entire stay.

‡ For the entire stay for patients in the intensive care unit.

§ ICU CCM type is a categorical level ICU variable that represents the percentage of patients managed by critical care physicians.

**Table 2. Propensity Score Variables Balanced Across Quartiles of the Propensity Score\***

| Variable                                | Quartiles of Propensity Score Across CCM |       |         |        |       |         |        |       |         |        |       |         |
|-----------------------------------------|------------------------------------------|-------|---------|--------|-------|---------|--------|-------|---------|--------|-------|---------|
|                                         | First                                    |       |         | Second |       |         | Third  |       |         | Fourth |       |         |
|                                         | No CCM                                   | CCM   | P Value | No CCM | CCM   | P Value | No CCM | CCM   | P Value | No CCM | CCM   | P Value |
| Mean age                                | 67.6                                     | 65.4  | <0.001  | 59.9   | 61.5  | <0.001  | 59.1   | 59.9  | 0.001   | 57.4   | 56.1  | <0.001  |
| Mean GCS                                | 13.8                                     | 13.4  | <0.001  | 13.7   | 13.3  | <0.001  | 12.9   | 12.6  | <0.001  | 11.5   | 11.2  | <0.001  |
| Mean licensed hospital beds             | 323.5                                    | 297.4 | <0.001  | 429.2  | 429.9 | 0.79    | 577.1  | 578.3 | 0.70    | 631    | 687.5 | <0.001  |
| Commercial or Medicaid, %               | 28.5                                     | 31.7  |         | 43.7   | 35.8  |         | 40.1   | 39.1  |         | 39.6   | 44.9  |         |
| Medicare, %                             | 68.6                                     | 64.5  | <0.001  | 49.1   | 53.8  | <0.001  | 49.7   | 51.5  | 0.016   | 46.7   | 42.4  | <0.001  |
| Self pay, %                             | 2.9                                      | 3.8   |         | 7.3    | 10.4  |         | 10.3   | 9.3   |         | 13.7   | 12.7  |         |
| Ventilation at admission, %             | 0.9                                      | 0.6   | 0.055   | 4.9    | 4.4   | 0.198   | 20.6   | 22.7  | <0.001  | 65.2   | 74.0  | <0.001  |
| Tracheostomy at admission, %            | 1.1                                      | 0.8   | 0.076   | 5.4    | 5.7   | 0.49    | 22.2   | 24.1  | 0.002   | 66.2   | 74.7  | <0.001  |
| Gastrointestinal bleed, %               | 11.4                                     | 8.5   | <0.001  | 4.4    | 5.6   | <0.001  | 2.7    | 3.3   | 0.014   | 2.1    | 1.2   | <0.001  |
| Noninvasive ventilation at admission, % | 0.3                                      | 0.3   | 0.31    | 0.7    | 1.0   | 0.056   | 2.8    | 2.8   | 0.87    | 4.0    | 3.5   | 0.050   |
| Cerebrovascular incident, %             | 8.0                                      | 6.5   | 0.001   | 3.6    | 4.9   | <0.001  | 3.0    | 3.5   | 0.076   | 1.9    | 1.5   | 0.102   |
| Chronic immunosuppression, %            | 1.8                                      | 2.5   | 0.005   | 4.2    | 4.4   | 0.59    | 5.1    | 5.1   | 0.94    | 6.5    | 6.2   | 0.43    |
| Chronic respiratory, %                  | 1.8                                      | 2.7   | <0.001  | 4.3    | 7.8   | <0.001  | 7.7    | 9.3   | <0.001  | 18.7   | 14.7  | <0.001  |
| Acute renal failure, %                  | 3.3                                      | 5.5   | <0.001  | 5.4    | 6.9   | <0.001  | 7.5    | 7.9   | 0.39    | 10.7   | 8.5   | <0.001  |
| Rural hospital, %                       | 35.9                                     | 29.4  |         | 6.6    | 6.7   |         | 7.5    | 6.7   |         | 1.7    | 1.3   |         |
| Suburban hospital, %                    | 37.5                                     | 33.4  | <0.001  | 48.1   | 45.8  | 0.017   | 27.6   | 30.1  | <0.001  | 25.4   | 30.0  | <0.001  |
| Urban hospital, %                       | 26.7                                     | 37.2  |         | 45.3   | 47.5  |         | 64.9   | 63.2  |         | 72.9   | 68.8  |         |
| Continuous sedation, %                  | 1.1                                      | 2.3   | <0.001  | 4.4    | 6.7   | <0.001  | 11.8   | 14.1  | <0.001  | 32.5   | 32.4  | 0.87    |
| Emergency department, %                 | 45.4                                     | 52.3  |         | 47.9   | 48.8  |         | 41.4   | 41.3  |         | 43.2   | 38.6  |         |
| Another hospital, %                     | 7.1                                      | 6.8   | <0.001  | 4.8    | 5.4   | <0.001  | 4.8    | 4.3   | 0.050   | 4.1    | 4.2   | <0.001  |
| Invasive procedure, %                   | 41.8                                     | 30.9  |         | 32.2   | 26.1  |         | 27.5   | 29.0  |         | 26.3   | 35.7  |         |
| Other non-ICU, %                        | 5.7                                      | 10.1  |         | 15.1   | 19.7  |         | 26.4   | 25.4  |         | 26.4   | 21.5  |         |

\* CCM = critical care management; GCS = Glasgow Coma Score; ICU = intensive care unit.

**Table 3. Random-Effects Logistic Regression Mortality Odds Ratio, Stratified by SAPS II and Propensity Score**

| Quartile of SAPS II Probability <sup>†</sup> | Quartile of Propensity Score <sup>‡</sup> | No CCM Count | CCM Count | CCM Odds Ratio (95% CI) <sup>§</sup> | <i>P</i> Value | $\rho$ <sup>  </sup> |
|----------------------------------------------|-------------------------------------------|--------------|-----------|--------------------------------------|----------------|----------------------|
| 1                                            | 1                                         | 6011         | 1,200     | 2.78 (1.29–5.76)                     | 0.0130         | 0.098                |
| 1                                            | 2                                         | 5974         | 2013      | 1.66 (0.89–3.00)                     | 0.1099         | 0.035                |
| 1                                            | 3                                         | 3664         | 2586      | 1.35 (0.78–2.38)                     | 0.2979         | 0.013                |
| 1                                            | 4                                         | 1224         | 3005      | 1.11 (0.48–1.89)                     | 0.7831         | 0.166                |
| 2                                            | 1                                         | 6335         | 1428      | 2.03 (1.41–2.74)                     | 0.0001         | 0.046                |
| 2                                            | 2                                         | 4749         | 1989      | 1.70 (1.25–2.26)                     | 0.0008         | 0.017                |
| 2                                            | 3                                         | 3189         | 2576      | 1.24 (0.93–1.64)                     | 0.1573         | 0.030                |
| 2                                            | 4                                         | 1580         | 3671      | 0.89 (0.65–1.15)                     | 0.4860         | 0.051                |
| 3                                            | 1                                         | 5135         | 1457      | 2.13 (1.51–2.26)                     | <0.0001        | 0.059                |
| 3                                            | 2                                         | 4078         | 1876      | 1.62 (1.30–1.89)                     | <0.0001        | 0.013                |
| 3                                            | 3                                         | 3320         | 2967      | 1.52 (1.26–1.75)                     | <0.0001        | 0.030                |
| 3                                            | 4                                         | 2147         | 4342      | 1.21 (0.90–1.24)                     | 0.0460         | 0.046                |
| 4                                            | 1                                         | 2874         | 1201      | 1.52 (1.15–1.56)                     | <0.0001        | 0.054                |
| 4                                            | 2                                         | 2770         | 1959      | 1.41 (1.25–1.62)                     | 0.0001         | 0.043                |
| 4                                            | 3                                         | 3487         | 3621      | 1.33 (1.21–1.49)                     | <0.0001        | 0.040                |
| 4                                            | 4                                         | 3109         | 6295      | 1.29 (1.11–1.34)                     | 0.0001         | 0.072                |

\* This table is recreated from Table 5 in the manuscript using additional covariates. CCM = critical care management; ICU = intensive care unit; SAPS II = Simplified Acute Physiology Score.

<sup>†</sup> Quartile 1 includes the lowest SAPS II probabilities of death, whereas quartile 4 includes the highest probabilities.

<sup>‡</sup> Quartile 1 is the lowest propensity of being seen by a critical care physician, whereas quartile 4 is the highest propensity.

<sup>§</sup> Random-effects logistic regression results, in which outcome is hospital mortality, adjusted for SAPS II probability of mortality, propensity to see a critical care physician, age, Glasgow Coma Score, gastrointestinal bleed (yes/no), noninvasive ventilation (yes/no), cerebrovascular incident (yes/no), chronic immunosuppression (yes/no), acute renal failure (yes/no), and origin (emergency department, another hospital, invasive procedure, other non-ICU).

<sup>||</sup>  $\rho$  is the ratio of the between ICU variance to the total variance. Zero indicates that all the variability is within the ICU, and 1.0 indicates that all the variability is between ICU.

**Table 4. Subgroup Analysis: Random-Effects Logistic Regression Odds Ratio**

| <b>Group</b>                                                                   | <b>Quartile of Propensity Score or SAPS II Probability<sup>†,‡</sup></b> | <b>No CCM</b> | <b>CCM</b> | <b>CCM Odds Ratio (95% CI)<sup>§</sup></b> | <b>P Value</b> |
|--------------------------------------------------------------------------------|--------------------------------------------------------------------------|---------------|------------|--------------------------------------------|----------------|
| Respiratory diagnosis and ventilator in place at ICU admission                 | –                                                                        | 3075          | 4822       | 1.19 (0.99–1.43)                           | 0.061          |
| Respiratory diagnosis and no ventilator in place at ICU admission              | –                                                                        | 7363          | 7074       | 1.12 (0.98–1.27)                           | 0.088          |
| Ventilator in place at ICU admission                                           | –                                                                        | 9121          | 14 581     | 1.29 (1.15–1.44)                           | <0.001         |
| Circulatory diagnosis                                                          | –                                                                        | 17 035        | 8572       | 1.48 (1.30–1.69)                           | <0.001         |
| Infection diagnosis                                                            | –                                                                        | 3258          | 3351       | 1.13 (0.97–1.33)                           | 0.127          |
| "No choice" group of ICUs                                                      | –                                                                        | 22 624        | 18 862     | 1.56 (1.29–1.89)                           | <0.001         |
| Patients not transferred from another hospital¶                                |                                                                          |               |            |                                            |                |
|                                                                                | 1                                                                        | 19 146        | 4779       | 1.71 (1.46–2.00)                           | <0.001         |
|                                                                                | 2                                                                        | 16 690        | 7235       | 1.50 (1.31–1.71)                           | <0.001         |
|                                                                                | 3                                                                        | 12 896        | 11 026     | 1.32 (1.18–1.47)                           | <0.001         |
|                                                                                | 4                                                                        | 7643          | 16 281     | 1.27 (1.14–1.41)                           | <0.001         |
| Diagnosis other than respiratory and no ventilator in place at ICU admission** |                                                                          |               |            |                                            |                |
|                                                                                | 1                                                                        | 11 326        | 4617       | 2.11 (1.21–3.68)                           | 0.008          |
|                                                                                | 2                                                                        | 11 365        | 4552       | 1.89 (1.40–2.56)                           | <0.001         |
|                                                                                | 3                                                                        | 11 026        | 4884       | 1.90 (1.58–2.27)                           | <0.001         |
|                                                                                | 4                                                                        | 9444          | 6478       | 1.50 (1.35–1.66)                           | <0.001         |
| ≥1 ICU procedures¶¶                                                            |                                                                          |               |            |                                            |                |
|                                                                                | 1                                                                        | 12 180        | 4131       | 1.63 (1.38–1.92)                           | <0.001         |
|                                                                                | 2                                                                        | 9510          | 6800       | 1.16 (1.02–1.31)                           | 0.022          |
|                                                                                | 3                                                                        | 7087          | 9222       | 1.32 (1.17–1.48)                           | <0.001         |
|                                                                                | 4                                                                        | 4384          | 11 926     | 1.18 (1.03–1.35)                           | 0.015          |
| No ICU procedures**                                                            |                                                                          |               |            |                                            |                |
|                                                                                | 1                                                                        | 6506          | 2647       | 2.05 (0.77–5.47)                           | 0.150          |
|                                                                                | 2                                                                        | 6714          | 2445       | 1.44 (0.87–2.39)                           | 0.161          |
|                                                                                | 3                                                                        | 6692          | 2440       | 1.27 (0.94–1.73)                           | 0.122          |
|                                                                                | 4                                                                        | 6572          | 2575       | 1.33 (1.12–1.58)                           | 0.001          |

\* This table is recreated from Table 6 in the manuscript using additional covariates. CCM = critical care management; ICU = intensive care unit; SAPS II = Simplified Acute Physiology Score.

<sup>†</sup> Quartile 1 is the lowest propensity of being seen by a critical care doctor, whereas quartile 4 is the highest propensity.

<sup>‡</sup> Quartile 1 includes the lowest SAPS II probabilities of mortality, whereas quartile 4 includes the highest probabilities.

<sup>§</sup> Random-effects logistic regression results, in which outcome is hospital mortality, adjusted for SAPS II probability of mortality, propensity to see a critical care physician, age, Glasgow Coma Score, gastrointestinal bleed (yes/no), noninvasive ventilation (yes/no), cerebrovascular

**Table 5. Random-Effects Logistic Regression Odds Ratio for Mortality, Stratified by SAPS II and Propensity Score\***

| <b>Quartile of SAPS II Probability†</b> | <b>Quartile of Propensity Score‡</b> | <b>No CCM Count</b> | <b>CCM Count</b> | <b>CCM Odds Ratio (95% CI)§</b> | <b>P Value</b> | <b>ρ  </b> |
|-----------------------------------------|--------------------------------------|---------------------|------------------|---------------------------------|----------------|------------|
| 1                                       | 1                                    | 6011                | 1200             | 2.41 (0.94–6.20)                | 0.068          | 0.05       |
| 1                                       | 2                                    | 5974                | 2013             | 1.80 (0.92–3.52)                | 0.086          | 0.03       |
| 1                                       | 3                                    | 3664                | 2586             | 1.35 (0.73–2.49)                | 0.34           | <0.01      |
| 1                                       | 4                                    | 1224                | 3005             | 1.36 (0.64–2.90)                | 0.43           | 0.13       |
| 2                                       | 1                                    | 6335                | 1428             | 2.28 (1.55–3.35)                | <0.001         | 0.04       |
| 2                                       | 2                                    | 4749                | 1989             | 1.76 (1.27–2.44)                | 0.001          | 0.01       |
| 2                                       | 3                                    | 3189                | 2576             | 1.21 (0.87–1.67)                | 0.25           | 0.03       |
| 2                                       | 4                                    | 1580                | 3671             | 0.88 (0.64–1.21)                | 0.43           | 0.05       |
| 3                                       | 1                                    | 5135                | 1457             | 2.32 (1.81–2.97)                | <0.001         | 0.05       |
| 3                                       | 2                                    | 4078                | 1876             | 1.77 (1.41–2.22)                | <0.001         | 0.04       |
| 3                                       | 3                                    | 3320                | 2967             | 1.46 (1.20–1.77)                | <0.001         | 0.03       |
| 3                                       | 4                                    | 2147                | 4342             | 1.17 (0.97–1.41)                | 0.098          | 0.05       |
| 4                                       | 1                                    | 2874                | 1201             | 1.47 (1.21–1.77)                | <0.001         | 0.04       |
| 4                                       | 2                                    | 2770                | 1959             | 1.36 (1.15–1.59)                | <0.001         | 0.04       |
| 4                                       | 3                                    | 3487                | 3621             | 1.32 (1.17–1.51)                | <0.001         | 0.03       |
| 4                                       | 4                                    | 3109                | 6295             | 1.17 (1.04–1.31)                | 0.008          | 0.03       |

\* This table is recreated from Table 5 in the manuscript using additional variables: primary medical school, ICU type, and nursing policy in the propensity score. CCM = critical care management; ICU = intensive care unit; SAPS II = Simplified Acute Physiology Score.

† Quartile 1 includes the lowest SAPS II probabilities of death, whereas quartile 4 includes the highest probabilities.

‡ Quartile 1 is the lowest propensity of being seen by a critical care physician, whereas quartile 4 is the highest propensity.

§ Random-effects logistic regression results, in which outcome is hospital mortality, adjusted for SAPS II probability of mortality and propensity to see a critical care physician.

|| ρ is the ratio of the between ICU variance to the total variance. Zero indicates that all the variability is within the ICU, and 1.0 indicates that all the variability is between ICU.

**Table 6. Sensitivity of the Mortality Odds Ratio when the 4 Most Influential Covariates are Removed from the Propensity Score\***

| Quartile of<br>SAPS II<br>Probability† | Quartile of<br>Propensity<br>Score‡ | Mortality Odds Ratio for CCM Versus No CCM§ |                                  |                              |                                |                               |
|----------------------------------------|-------------------------------------|---------------------------------------------|----------------------------------|------------------------------|--------------------------------|-------------------------------|
|                                        |                                     | Manuscript<br>Table                         | No<br>Noninvasive<br>Ventilation | No<br>Ventilator<br>in Place | No<br>Tracheostomy<br>in Place | No Hospital<br>Classification |
| 1                                      | 1                                   | 2.83                                        | 2.68                             | 2.90                         | 3.04                           | 2.31                          |
| 1                                      | 2                                   | 1.98                                        | 1.80                             | 1.81                         | 1.70                           | 1.54                          |
| 1                                      | 3                                   | 1.45                                        | 1.02                             | 0.89                         | 0.93                           | 1.27                          |
| 1                                      | 4                                   | 1.11                                        | 0.84                             | 0.84                         | 0.97                           | 0.8                           |
| 2                                      | 1                                   | 2.12                                        | 1.65                             | 1.67                         | 1.69                           | 1.56                          |
| 2                                      | 2                                   | 1.88                                        | 1.84                             | 1.88                         | 1.80                           | 1.76                          |
| 2                                      | 3                                   | 1.25                                        | 1.15                             | 1.11                         | 1.06                           | 1.22                          |
| 2                                      | 4                                   | 0.86                                        | 1.04                             | 1.03                         | 1.06                           | 1.00                          |
| 3                                      | 1                                   | 2.26                                        | 2.37                             | 2.41                         | 2.28                           | 2.25                          |
| 3                                      | 2                                   | 1.76                                        | 1.82                             | 1.81                         | 1.89                           | 1.89                          |
| 3                                      | 3                                   | 1.50                                        | 1.52                             | 1.47                         | 1.47                           | 1.42                          |
| 3                                      | 4                                   | 1.19                                        | 1.17                             | 1.15                         | 1.14                           | 1.15                          |
| 4                                      | 1                                   | 1.53                                        | 1.46                             | 1.43                         | 1.51                           | 1.48                          |
| 4                                      | 2                                   | 1.36                                        | 1.36                             | 1.35                         | 1.33                           | 1.29                          |
| 4                                      | 3                                   | 1.36                                        | 1.21                             | 1.26                         | 1.19                           | 1.18                          |
| 4                                      | 4                                   | 1.18                                        | 1.17                             | 1.13                         | 1.17                           | 1.17                          |
| <b>Weighted average</b>                |                                     | 1.64                                        | 1.55                             | 1.55                         | 1.55                           | 1.49                          |

\* CCM = critical care management; SAPS II = Simplified Acute Physiology Score.

† Quartile 1 includes the lowest SAPS II probabilities of death, whereas quartile 4 includes the highest probabilities.

‡ Quartile 1 is the lowest propensity of being seen by a critical care physician, whereas quartile 4 is the highest propensity.

§ Random-effects logistic regression results, in which outcome is hospital mortality, adjusted for SAPS II probability of mortality and propensity to see a critical care physician.

**Table 7. Regular Logistic Regression Odds Ratio, Stratified by SAPS II and Propensity Score\***

| Quartile of SAPS II Probability† | Quartile of Propensity Score‡ | No CCM Count | CCM Count | CCM Odds Ratio (95% CI)§ | P Value |
|----------------------------------|-------------------------------|--------------|-----------|--------------------------|---------|
| 1                                | 1                             | 6011         | 1200      | 2.77 (1.32–5.80)         | 0.007   |
| 1                                | 2                             | 5974         | 2013      | 2.02 (1.13–3.63)         | 0.018   |
| 1                                | 3                             | 3664         | 2586      | 1.48 (0.86–2.54)         | 0.158   |
| 1                                | 4                             | 1224         | 3005      | 0.84 (0.43–1.64)         | 0.62    |
| 2                                | 1                             | 6335         | 1428      | 2.05 (1.48–2.85)         | <0.001  |
| 2                                | 2                             | 4749         | 1989      | 1.87 (1.40–2.50)         | <0.001  |
| 2                                | 3                             | 3189         | 2576      | 1.24 (0.94–1.63)         | 0.133   |
| 2                                | 4                             | 1580         | 3671      | 0.79 (0.60–1.05)         | 0.104   |
| 3                                | 1                             | 5135         | 1457      | 1.92 (1.58–2.33)         | <0.001  |
| 3                                | 2                             | 4078         | 1876      | 1.64 (1.37–1.97)         | <0.001  |
| 3                                | 3                             | 3320         | 2967      | 1.38 (1.18–1.62)         | <0.001  |
| 3                                | 4                             | 2147         | 4342      | 1.04 (0.89–1.21)         | 0.63    |
| 4                                | 1                             | 2874         | 1201      | 1.37 (1.19–1.57)         | <0.001  |
| 4                                | 2                             | 2770         | 1959      | 1.39 (1.24–1.57)         | <0.001  |
| 4                                | 3                             | 3487         | 3621      | 1.25 (1.14–1.38)         | <0.001  |
| 4                                | 4                             | 3109         | 6295      | 1.13 (1.03–1.23)         | 0.007   |

\* This table is recreated from Table 5 in the manuscript using logistic regression. CCM = critical care management; SAPS II = Simplified Acute Physiology Score.

† Quartile 1 includes the lowest SAPS II probabilities of death, whereas quartile 4 includes the highest probabilities.

‡ Quartile 1 is the lowest propensity of being seen by a critical care physician, whereas quartile 4 is the highest propensity.

§ Random-effects logistic regression results, in which outcome is hospital mortality, adjusted for SAPS II probability of mortality and propensity to see a critical care physician.

**Table 6. Subgroup Analysis: Random-Effects Logistic Regression Odds Ratios\***

| Group                                                                  | Quartile of Propensity score or SAPS II Probability†, ‡ | No CCM | CCM    | CCM Odds Ratio (95% CI)§ | P Value |
|------------------------------------------------------------------------|---------------------------------------------------------|--------|--------|--------------------------|---------|
| Respiratory diagnosis and ventilation at ICU admission                 | –                                                       | 3075   | 4822   | 1.26 (1.10–1.44)         | 0.001   |
| Respiratory diagnosis and no ventilation at ICU admission              | –                                                       | 7363   | 7074   | 1.05 (0.95–1.16)         | 0.39    |
| Ventilation at ICU admission                                           | –                                                       | 9121   | 14 581 | 1.35 (1.25–1.45)         | <0.001  |
| Circulatory diagnosis                                                  | –                                                       | 17 035 | 8572   | 1.47 (1.32–1.63)         | <0.001  |
| Infection diagnosis                                                    | –                                                       | 3258   | 3351   | 1.15 (1.02–1.31)         | 0.029   |
| "No-choice" group of ICUs                                              | –                                                       | 22 624 | 18 862 | 1.37 (1.28–1.46)         | <0.001  |
| Patients not transferred from another hospital¶                        |                                                         |        |        |                          |         |
|                                                                        | 1                                                       | 19 146 | 4779   | 1.48 (1.32–1.67)         | <0.001  |
|                                                                        | 2                                                       | 16 690 | 7235   | 1.47 (1.32–1.67)         | <0.001  |
|                                                                        | 3                                                       | 12 896 | 11 026 | 1.24 (1.14–1.35)         | <0.001  |
|                                                                        | 4                                                       | 7643   | 16 281 | 1.14 (1.05–1.24)         | 0.001   |
| Diagnosis other than respiratory and no ventilation at ICU admission** |                                                         |        |        |                          |         |
|                                                                        | 1                                                       | 11 326 | 4617   | 2.10 (1.29–3.43)         | 0.003   |
|                                                                        | 2                                                       | 11 365 | 4552   | 1.90 (1.45–2.49)         | <0.001  |
|                                                                        | 3                                                       | 11 026 | 4884   | 1.89 (1.62–2.20)         | <0.001  |
|                                                                        | 4                                                       | 9444   | 6478   | 1.43 (1.33–1.54)         | <0.001  |
| ≥1 ICU procedures¶                                                     |                                                         |        |        |                          |         |
|                                                                        | 1                                                       | 12 180 | 4131   | 1.48 (1.32–1.66)         | <0.001  |
|                                                                        | 2                                                       | 9510   | 6800   | 1.18 (1.08–1.30)         | <0.001  |
|                                                                        | 3                                                       | 7087   | 9222   | 1.26 (1.16–1.38)         | <0.001  |
|                                                                        | 4                                                       | 4384   | 11 926 | 1.13 (1.02–1.24)         | 0.017   |
| No ICU procedures**                                                    |                                                         |        |        |                          |         |
|                                                                        | 1                                                       | 6506   | 2647   | 2.11 (0.80–5.551)        | 0.129   |
|                                                                        | 2                                                       | 6714   | 2445   | 1.47 (0.90–2.40)         | 0.121   |
|                                                                        | 3                                                       | 6692   | 2440   | 1.26 (0.95–1.66)         | 0.103   |
|                                                                        | 4                                                       | 6572   | 2575   | 1.15 (1.01–1.31)         | 0.040   |

\* This table is recreated from Table 6 in the manuscript using logistic regression. CCM = critical care management; ICU = intensive care unit; SAPS II = Simplified Acute Physiology Score.

† Quartile 1 is the lowest propensity of being seen by a critical care doctor, whereas quartile 4 is the highest propensity.

‡ Quartile 1 includes the lowest SAPS II probabilities of mortality, whereas quartile 4 includes the highest probabilities.

§ Logistic regression results, in which outcome is hospital mortality, adjusted for SAPS II probability of mortality and propensity to see a critical care physician.

|| No choice is defined an ICU that manages ≥95% of its patients by a critical care physician or an ICU that manages ≤5% of its patients by a critical care physician.

¶ Statistically significant interactions between propensity score and CCM variable; thus, analysis is run individually over the propensity score quartiles.

\*\* Statistically significant interactions between SAPS II probability of mortality and CCM variable; thus, analysis is run individually over the SAPS II probability quartiles.

**Table 9. Intensive Care Units that Treat 5% to 95% of their patients with Critical Care Management\***

| Probability† | Propensity‡ | No CCM | CCM  | Odds Ratio (95% CI)§ | P Value | ρ     |
|--------------|-------------|--------|------|----------------------|---------|-------|
| 1            | 1           | 3106   | 817  | 3.18 (0.97–10.45)    | 0.057   | 0.000 |
| 1            | 2           | 3771   | 1364 | 1.55 (0.71–3.41)     | 0.270   | 0.030 |
| 1            | 3           | 3035   | 1326 | 1.71 (0.81–3.60)     | 0.160   | 0.041 |
| 1            | 4           | 1081   | 1152 | 1.24 (0.54–2.84)     | 0.607   | 0.145 |
| 2            | 1           | 3346   | 967  | 2.34 (1.52–3.59)     | 0.000   | 0.025 |
| 2            | 2           | 3064   | 1326 | 1.87 (1.27–2.75)     | 0.002   | 0.021 |
| 2            | 3           | 2449   | 1283 | 1.31 (0.89–1.93)     | 0.173   | 0.068 |
| 2            | 4           | 1265   | 1717 | 0.86 (0.59–1.23)     | 0.404   | 0.102 |
| 3            | 1           | 2709   | 990  | 2.51 (1.92–3.28)     | 0.000   | 0.046 |
| 3            | 2           | 2480   | 1232 | 1.74 (1.36–2.23)     | 0.000   | 0.038 |
| 3            | 3           | 2318   | 1629 | 1.62 (1.30–2.03)     | 0.000   | 0.042 |
| 3            | 4           | 1625   | 2110 | 1.19 (0.97–1.46)     | 0.088   | 0.051 |
| 4            | 1           | 1242   | 814  | 1.54 (1.26–1.89)     | 0.000   | 0.042 |
| 4            | 2           | 1298   | 1208 | 1.35 (1.13–1.61)     | 0.001   | 0.041 |
| 4            | 3           | 2022   | 2195 | 1.40 (1.21–1.61)     | 0.000   | 0.041 |
| 4            | 4           | 2209   | 3194 | 1.11 (0.98–1.26)     | 0.113   | 0.045 |

\* We used our original propensity score as a covariate in the model for only those who have a choice. CCM = critical care management; SAPS II = Simplified Acute Physiology Score.

† Quartile 1 includes the lowest SAPS II probabilities of death, whereas quartile 4 includes the highest probabilities.

‡ Quartile 1 is the lowest propensity of being seen by a critical care physician, whereas quartile 4 is the highest propensity.

§ Random-effects logistic regression results, in which outcome is hospital mortality, adjusted for SAPS II probability of mortality and propensity to see a critical care physician.

|| ρ is the ratio of the between ICU variance to the total variance. Zero indicates that all the variability is within the ICU, and 1.0 indicates that all the variability is between ICU.

**Table 10. Comparison of Mortality Odds Ratio for Critical Care Management Versus No Critical Care Management, by Different Regression Techniques\***

| <b>Model (<i>n</i> = 101 832)</b>       | <b>Mortality Odds Ratio<br/>(95% CI)†</b> | <b><i>P</i> Value</b> |
|-----------------------------------------|-------------------------------------------|-----------------------|
| Logistic regression                     | 1.34 (1.28–1.40)                          | <0.001                |
| Random-effects Logistic Regression‡, §  | 1.42 (1.34–1.51)                          | <0.001                |
| Between-effects logistic regression§    | 1.32 (1.25–1.39)                          | <0.001                |
| Fixed-effects logistic regression§,<br> | 1.44 (1.29–1.62)                          | <0.001                |

\* CCM = critical care management; ICU = intensive care unit; OR = odds ratio; SAPS II = Simplified Acute Physiology Score.

† Mortality OR is for CCM vs. no CCM and is adjusted for current propensity score and expanded SAPS II. No interaction terms with CCM in these models exist.

‡ Between hospital error variance is 0.13, and the within hospital error variance is 3.29. This produces a  $\rho$  equal to 0.04, which is equal to the between hospital variance to the total variance.

§ The stratification variable is the 123 hospitals to ICUs.

|| The fixed-effects logistic regression would not converge due to an overflow error in the maximum likelihood estimation by using the entire sample of 101 832; thus, we took a random sample of 1 to 3 of the observations by hospital to ICU and used 33 582 participants.

**Table 11. Variables in the Expanded Propensity Score\***

| Number | Variables                                                                                                         |
|--------|-------------------------------------------------------------------------------------------------------------------|
| 1      | Age                                                                                                               |
| 2      | Chronic gastrointestinal<br>Chronic cardiovascular<br>Chronic respiratory<br>Chronic renal                        |
| 3      | Chronic use of Immunosuppressive Drugs<br>Chronic HIV                                                             |
| 4      | Active cancer within 5 y                                                                                          |
| 5      | Gender                                                                                                            |
| 6      | Race<br>White<br>Black<br>Other/unknown                                                                           |
| 7      | Insurance<br>Commercial/managed care<br>Medicaid<br>Medicare<br>Self pay                                          |
| 8      | Invasive monitoring in place at ICU admission                                                                     |
| 9      | Acute renal failure                                                                                               |
| 10     | Continuous sedation                                                                                               |
| 11     | Coma or deep stupor                                                                                               |
| 12     | Gastrointestinal bleed                                                                                            |
| 13     | Noninvasive respiratory support (BiPAP/CPAP) in place at ICU admission                                            |
| 14     | Full code                                                                                                         |
| 15     | Glasgow Coma Score<br>3–5<br>6–9<br>10–12<br>13–15                                                                |
| 16     | Nutritional support in place at ICU admission                                                                     |
| 17     | Surgery before ICU admission                                                                                      |
| 18     | Mechanical ventilator in place at ICU admission + previous positive pressure ventilation                          |
| 19     | Thoracostomy in place at ICU admission                                                                            |
| 20     | Tracheal airway in place at ICU admission                                                                         |
| 21     | Arterial lines in place at ICU admission                                                                          |
| 22     | Central venous line in place at ICU admission                                                                     |
| 23     | Pulmonary artery catheter in place at ICU admission                                                               |
| 24     | Heart rate >150 at ICU admission                                                                                  |
| 25     | Systolic blood pressure <90 at ICU admission                                                                      |
| 26     | Number of licensed hospital beds                                                                                  |
| 27     | Primary medical school                                                                                            |
| 28     | Hospital region<br>Central<br>Mid and South Atlantic<br>New England<br>West & Mountain                            |
| 29     | Hospital classification<br>Urban<br>Suburban<br>Rural                                                             |
| 30     | Hospital organization<br>Academic<br>Community, not for profit, nonacademic<br>Community, for profit, nonacademic |
| 31     | Location before ICU<br>Emergency department<br>Another hospital<br>Invasive procedure<br>Other non-ICU unit       |
| 32     | ICU type<br>Combined medical – surgical or other ICU<br>Medical ICU only<br>Surgical trauma ICU                   |
| 33     | Nurse policy<br>RN or LPN<br>RN only<br>RN with CCRN                                                              |
| 34     | Nurse to ratio<br>1:1<br>1:2<br>1:3<br>Other                                                                      |

\* BiPAP = Bilevel positive airway pressure; CCRN = Critical Care Nurse; CPAP = continuous positive airway pressure; ICU = intensive care unit; LPN = licensed practical nurse; RN = registered professional nurse.

**Table 12. Mortality Odds Ratio for Critical Care Management Versus No Critical Care Management Comparing the Expanded Propensity Score Versus the Old Propensity Score for the Largest 19 Hospitals\***

| Hospital | Original Propensity Score† |         | Expanded Propensity Score‡ |         | Reduced Data Set§ |         | Full Data Set |         |
|----------|----------------------------|---------|----------------------------|---------|-------------------|---------|---------------|---------|
|          | OR                         | P Value | OR                         | P Value | OR                | P Value | OR            | P Value |
| 1        | 3.04                       | <0.001  | 2.64                       | <0.001  | 2.33              | 0.001   | 2.35          | 0.001   |
| 2        | 1.62                       | 0.143   | 1.45                       | 0.261   | 1.40              | 0.391   | 1.26          | 0.522   |
| 3        | 0.96                       | 0.879   | 0.95                       | 0.872   | 1.04              | 0.921   | 1.04          | 0.921   |
| 4        | 0.95                       | 0.812   | 0.90                       | 0.597   | 1.06              | 0.810   | 1.06          | 0.803   |
| 5        | 1.45                       | 0.001   | 1.49                       | 0.002   | 1.61              | 0.003   | 1.60          | 0.003   |
| 6        | 1.08                       | 0.535   | 1.03                       | 0.796   | 1.15              | 0.340   | 1.17          | 0.292   |
| 7        | 1.64                       | 0.089   | 1.73                       | 0.067   | 1.87              | 0.057   | 1.92          | 0.046   |
| 8        | 2.28                       | <0.001  | 1.93                       | 0.004   | 2.00              | 0.008   | 1.92          | 0.011   |
| 9        | 1.35                       | 0.203   | 1.37                       | 0.208   | 1.35              | 0.289   | 1.35          | 0.294   |
| 10       | 1.27                       | 0.216   | 1.13                       | 0.537   | 1.01              | 0.968   | 1.00          | 0.999   |
| 11       | 1.64                       | 0.015   | 1.52                       | 0.043   | 1.71              | 0.020   | 1.76          | 0.016   |
| 12       | 1.48                       | 0.047   | 1.19                       | 0.383   | 1.21              | 0.405   | 1.16          | 0.524   |
| 13       | 2.27                       | 0.001   | 2.07                       | 0.004   | 2.44              | 0.002   | 2.49          | 0.002   |
| 14       | 3.74                       | <0.001  | 3.15                       | <0.001  | 3.39              | <0.001  | 2.96          | 0.001   |
| 15       | 2.42                       | 0.001   | 3.28                       | 0.001   | 3.89              | 0.002   | 3.89          | 0.002   |
| 16       | 2.26                       | <0.001  | 1.94                       | <0.001  | 1.71              | 0.006   | 1.71          | 0.006   |
| 17       | 0.84                       | 0.195   | 0.94                       | 0.672   | 0.96              | 0.782   | 0.95          | 0.722   |
| 18       | 0.99                       | 0.939   | 1.03                       | 0.874   | 1.25              | 0.280   | 1.25          | 0.280   |
| 19       | 1.40                       | 0.124   | 1.26                       | 0.310   | 1.32              | 0.256   | 1.31          | 0.271   |

\* SAPS II = Simplified Acute Physiology Score.

† Logistic regression with CCM, expanded SAPS II, and the old propensity score as main effects.

‡ Logistic regression with CCM, expanded SAPS II, and the expanded propensity score as main effects.

§ Conditional logistic regression matching cases (hospital death) and controls (hospital survival) on the expanded propensity score and eliminating controls that do not have a comparable expanded propensity score with that of the case (reduced data set).

|| Conditional logistic regression matching cases (hospital death) and controls (hospital survival) on the expanded propensity score (full data set).

**Table 13. Reduced Data Set Conditional Logistic Regression by using the Original Propensity Score and Combining all 19 Hospitals over Quartiles of Expanded SAPS II\***

| <b>Quartile of SAPS II</b> | <b>Dropped Due to Unmatched Propensity Score</b> | <b>Observations in Model</b> | <b>Odds Ratio</b> | <b>P Value</b> |
|----------------------------|--------------------------------------------------|------------------------------|-------------------|----------------|
| 1                          | 4099                                             | 2690                         | 1.38              | 0.345          |
| 2                          | 4007                                             | 3948                         | 1.24              | 0.159          |
| 3                          | 3970                                             | 4194                         | 1.62              | <0.001         |
| 4                          | 2859                                             | 4222                         | 1.28              | 0.005          |
| <b>Total</b>               | 14 935                                           | 15 054†                      | –                 | –              |

\* SAPS II = Simplified Acute Physiology Score.

† Reduced data set used in the analysis.

**Table 14. Random-Effects Logistic Regression using the Current Propensity Score and Combining all 19 Hospitals over Quartiles of Expanded SAPS II\***

| <b>Quartile of SAPS II</b> | <b>Observations in model</b> | <b>Odds Ratio</b> | <b>P Value</b> |
|----------------------------|------------------------------|-------------------|----------------|
| 1                          | 8244                         | 1.63              | 0.096          |
| 2                          | 8251                         | 1.23              | 0.128          |
| 3                          | 8288                         | 1.70              | <0.001         |
| 4                          | 8293                         | 1.33              | <0.001         |
| <b>Total</b>               | 33 076                       | –                 | –              |

\* SAPS II = Simplified Acute Physiology Score.

**Table 15. Full Data Set Conditional Logistic Regression using the Original Propensity Score and Combining all 19 Hospitals over Quartiles of Expanded SAPS II\***

| <b>Quartile of SAPS II</b> | <b>Observations in Model</b> | <b>Odds Ratio</b> | <b>P Value</b> |
|----------------------------|------------------------------|-------------------|----------------|
| 1                          | 4465                         | 1.32              | 0.417          |
| 2                          | 7247                         | 1.15              | 0.370          |
| 3                          | 7893                         | 1.54              | <0.001         |
| 4                          | 8203                         | 1.23              | 0.002          |
| <b>Total</b>               | 27 808†                      | –                 | –              |

\* SAPS II = Simplified Acute Physiology Score.

† Full data set used in the analysis.

**Table 16. Random-Effects Logistic Regression Mortality Odds Ratio Stratified By Propensity Score\***

| <b>Propensity Quartile†</b> | <b>No CCM Count</b> | <b>CCM Count</b> | <b>Mortality Odds Ratio (95% CI)‡</b> | <b>P Value</b> | <b>ρ§</b> |
|-----------------------------|---------------------|------------------|---------------------------------------|----------------|-----------|
| 1                           | 21 416              | 4044             | 1.92 (1.63–2.26)                      | <0.001         | 0.12      |
| 2                           | 19 152              | 6304             | 1.56 (1.39–1.75)                      | <0.001         | 0.15      |
| 3                           | 14 132              | 11 326           | 1.39 (1.28–1.52)                      | <0.001         | 0.17      |
| 4                           | 4946                | 20 152           | 1.09 (0.98–1.21)                      | 0.123          | 0.092     |

\* CCM = critical care management; ICU = intensive care unit.

† Quartile 1 is the lowest propensity of being seen by a critical care physician, whereas quartile 4 is the highest propensity.

‡ Random-effects logistic regression results, in which outcome is hospital mortality and adjusted for SAPS II probability of mortality.

§ ρ = is the ratio of the between ICU variance to the total variance. Zero indicates that all the variability is within the ICU, and 1.0 indicates that all the variability is between ICU.

**Table 17. Comparison of Project Impact and AHA Hospitals\***

| <b>Variable</b>             | <b>Project Impact<br/>Hospitals</b> | <b>AHA Hospitals<br/>2002</b> |
|-----------------------------|-------------------------------------|-------------------------------|
| <i>n, %</i>                 | 100 (100)                           | 5949 (100)                    |
| Hospital beds, %            |                                     |                               |
| 50–99                       | 1                                   | 1372 (23)                     |
| 100–199                     | 6                                   | 1396 (23)                     |
| 200–299                     | 17                                  | 717 (12)                      |
| 300–399                     | 23                                  | 409 (7)                       |
| 400–499                     | 15                                  | 201 (3)                       |
| ≥500                        | 38                                  | 324 (5)                       |
| Urban, %                    | 47                                  | 3571 (60)                     |
| Academic hospital, %        | 13                                  | 364 (6)                       |
| Community not for profit, % | 81                                  | 2730 (46)                     |
| Community for profit, %     | 6                                   | 838 (14)                      |
| Geographic region           |                                     |                               |
| Central                     | 52                                  | 3034 (51)                     |
| Mid and South Atlantic      | 24                                  | 1540 (26)                     |
| New England                 | 12                                  | 269 (5)                       |
| West and Mountain           | 12                                  | 1106 (19)                     |

\* AHA = American Hospital Association. The source of the AHA data is the FY2002 AHA Annual Survey Database. (Chicago: Health Forum, an American Hospital Association affiliate, 2003. Compiled by AHA Resource Center on 12 December 2007). The PI database does not include any City or County, State, Veterans Administration, Military, or other Federal Government hospitals.
